# Supplementary material for: Distinct anisotropy and a high power factor in highly textured TiS2 ceramics via mechanical exfoliation
Source: Royal Society of Chemistry journal article supplement (doi:10.1039/d0cc02097d), 2020-01-01
Supplement: d0cc02097d1.pdf [file d0cc02097d1.pdf]

## Electronic supplementary information

### Distinct anisotropy and high power factor in highly textured $\text{TiS}_2$ ceramics via mechanical exfoliation

Yan Gu,<sup>a</sup> Kaikai Song,<sup>a</sup> Xiaohui Hu,<sup>a</sup> Changchun Chen,<sup>a</sup> Lin Pan,<sup>ab</sup> Chunhua Lu,<sup>ab</sup> Xiaodong Shen,<sup>ab</sup>  
Kunihito Koumoto<sup>c</sup> and Yifeng Wang<sup>\*ab</sup>

<sup>a</sup>College of Materials Science and Engineering, Nanjing Tech University, Nanjing 210009, China.

<sup>b</sup>Jiangsu Collaborative Innovation Center for Advanced Inorganic Function Composites, Nanjing Tech University, Nanjing 210009, China

<sup>c</sup>Nagoya Industrial Science Research Institute, Nagoya, 464-0819, Japan

E-mail: (corresponding author) yifeng.wang@nitech.edu.cn

#### S1. AFM images for Exfoli- $\text{TiS}_2$ nanosheets

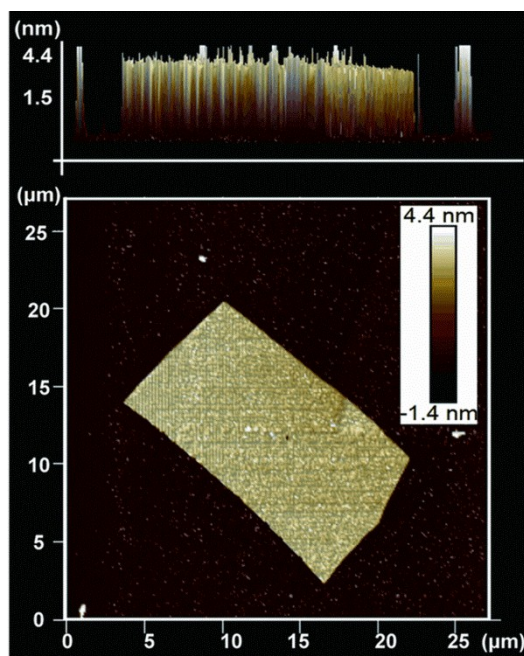

Fig. S1 AFM images for Exfoli- $\text{TiS}_2$  nanosheets.

In order to avoid agglomeration, the AFM sample is prepared from high speed of centrifugation (12000 rpm/min) in ethyl alcohol. As shown in Fig. S1, a distinct and sharp morphology can be observed in the nanosheet, of which the length is about 10  $\mu\text{m}$ , right within the size range shown above, and the thickness is only about 4 nm, corresponding to the dimension of about 7 units along the c-axis ( $c \sim 5.7\text{\AA}$ ).

## S2. XRD patterns of Raw- and Exfoli- (Exf.) $\text{TiS}_2$ powders.

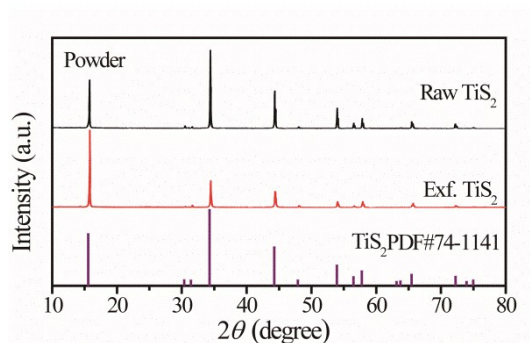

Fig. S2 XRD patterns of Raw- and Exfoli- (Exf.)  $\text{TiS}_2$  powders.

As shown in Fig. S2, both the samples were found to be of single phase in accordance with the standard profile of 1T-type  $\text{TiS}_2$  (PDF#74-1141). Comparatively, in Exfoli- $\text{TiS}_2$ , intensities of the (00l) peaks are much higher, indicating a stronger orientation of the resultant particles that would be caused by hand press during being filled into the sample holder. Particularly, the peaks are all still very sharp without obvious broadening, evidencing the preserved high crystallinity after exfoliation, which can be regarded as a distinct advantage over the ball milling process that usually causes amorphization and destruction of the original plate-like morphology.
